# Supplementary material for: Variation in gait parameters used for objective lameness assessment in sound horses at the trot on the straight line and the lunge
Source: PubMed Central journal article supplement (PMC6850282; doi:10.1111/evj.13075), 2019-02-12
Supplement: EVJ-51-831-s001.pdf [file EVJ-51-831-s001.pdf]

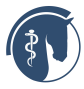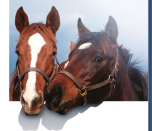**Supplementary Item 1:** Details of the study population.

|           | <b>Year of birth</b> | <b>Gender</b> | <b>Breed</b>       | <b>Body mass (kg)</b> | <b>Discipline</b>    |
|-----------|----------------------|---------------|--------------------|-----------------------|----------------------|
| <b>1</b>  | 2007                 | Mare          | Baden-Württemberg  | 450                   | Jumping/Dressage A   |
| <b>2</b>  | 2011                 | Gelding       | Frisian            | 553                   | No competition       |
| <b>3</b>  | 2009                 | Mare          | Hannoveraner       | 569                   | Jumping/Dressage A/L |
| <b>4</b>  | 2012                 | Mare          | Oldenburger        | 536                   | Dressage A           |
| <b>5</b>  | 2007                 | Gelding       | KWPN               | 572                   | Dressage M/S         |
| <b>6</b>  | 2007                 | Mare          | Westfalen          | 570                   | Jumping S            |
| <b>7</b>  | 2011                 | Mare          | KWPN               | 560                   | Jumping L            |
| <b>8</b>  | 2012                 | Mare          | Holsteiner         | 532                   | Jumping A/L          |
| <b>9</b>  | 2002                 | Gelding       | Holsteiner         | 652                   | No competition       |
| <b>10</b> | 2008                 | Mare          | Hanoveraner        | 510                   | Jumping L            |
| <b>11</b> | 2011                 | Mare          | British sporthorse | 498                   | Jumping L            |
| <b>12</b> | 2007                 | Mare          | Irish sporthorse   | 608                   | Jumping A/L          |
