# Supplementary material for: Variation in gait parameters used for objective lameness assessment in sound horses at the trot on the straight line and the lunge
Source: PubMed Central journal article supplement (PMC6850282; doi:10.1111/evj.13075), 2019-02-12
Supplement: EVJ-51-831-s002.pdf [file EVJ-51-831-s002.pdf]

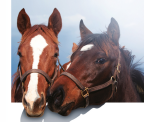

**Supplementary Item 2:** Time schedule of all measurements (M1-M12).

| Day          | Horse | M1&M6 | M2&M7 | M3&M8 | M4&M9 | M5&M10 | M11 | M12       |
|--------------|-------|-------|-------|-------|-------|--------|-----|-----------|
| <b>1</b>     | 1     | 8:00  | 8:05  | 8:15  | 8:25  | 8:35   |     |           |
|              | 2     | 8:50  | 8:55  | 9:05  | 9:15  | 9:25   |     |           |
|              | 3     | 9:40  | 9:45  | 9:55  | 10:05 | 10:15  |     |           |
|              | 4     | 10:30 | 10:35 | 10:45 | 10:55 | 11:05  |     |           |
|              | 5     | 11:20 | 11:25 | 11:35 | 11:45 | 11:55  |     |           |
| <b>2</b>     | 1     | 8:00  | 8:05  | 8:15  | 8:25  | 8:35   |     |           |
|              | 2     | 8:50  | 8:55  | 9:05  | 9:15  | 9:25   |     |           |
|              | 3     | 9:40  | 9:45  | 9:55  | 10:05 | 10:15  |     |           |
|              | 4     | 10:30 | 10:35 | 10:45 | 10:55 | 11:05  |     |           |
|              | 5     | 11:20 | 11:25 | 11:35 | 11:45 | 11:55  |     |           |
| <b>3</b>     | 6     | 8:00  | 8:05  | 8:15  | 8:25  | 8:35   |     |           |
|              | 7     | 8:50  | 8:55  | 9:05  | 9:15  | 9:25   |     |           |
|              | 8     | 9:40  | 9:45  | 9:55  | 10:05 | 10:15  |     |           |
|              | 9     | 10:30 | 10:35 | 10:45 | 10:55 | 11:05  |     |           |
|              | 10    | 11:20 | 11:25 | 11:35 | 11:45 | 11:55  |     |           |
|              | 11    | 12:10 | 12:15 | 12:25 | 12:35 | 12:45  |     |           |
|              | 12    | 13:00 | 13:05 | 13:15 | 13:25 | 13:35  |     |           |
| <b>4</b>     | 6     | 8:00  | 8:05  | 8:15  | 8:25  | 8:35   |     |           |
|              | 7     | 8:50  | 8:55  | 9:05  | 9:15  | 9:25   |     |           |
|              | 8     | 9:40  | 9:45  | 9:55  | 10:05 | 10:15  |     |           |
|              | 9     | 10:30 | 10:35 | 10:45 | 10:55 | 11:05  |     |           |
|              | 10    | 11:20 | 11:25 | 11:35 | 11:45 | 11:55  |     |           |
|              | 11    | 12:10 | 12:15 | 12:25 | 12:35 | 12:45  |     |           |
|              | 12    | 13:00 | 13:05 | 13:15 | 13:25 | 13:35  |     |           |
| <b>28-42</b> | 1-12  |       |       |       |       |        | 0*  | +5 min.** |

\*Horses were measured at different timepoints during the last day (M11).

\*\* M12 was done 5 minutes after M11
