# Supplementary material for: Variation in gait parameters used for objective lameness assessment in sound horses at the trot on the straight line and the lunge
Source: PubMed Central journal article supplement (PMC6850282; doi:10.1111/evj.13075), 2019-02-12

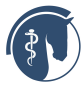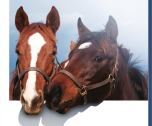

**Supplementary Item 3:** Visualisation of the symmetry parameters. RUD (Range Up Difference; Range Up 1 - Range Up 2); RDD (Range Down Difference; Range Down 1 - Range Down 2); MinDiff (difference between the two minima of the movement); MaxDiff (difference between the two maxima of the movement).

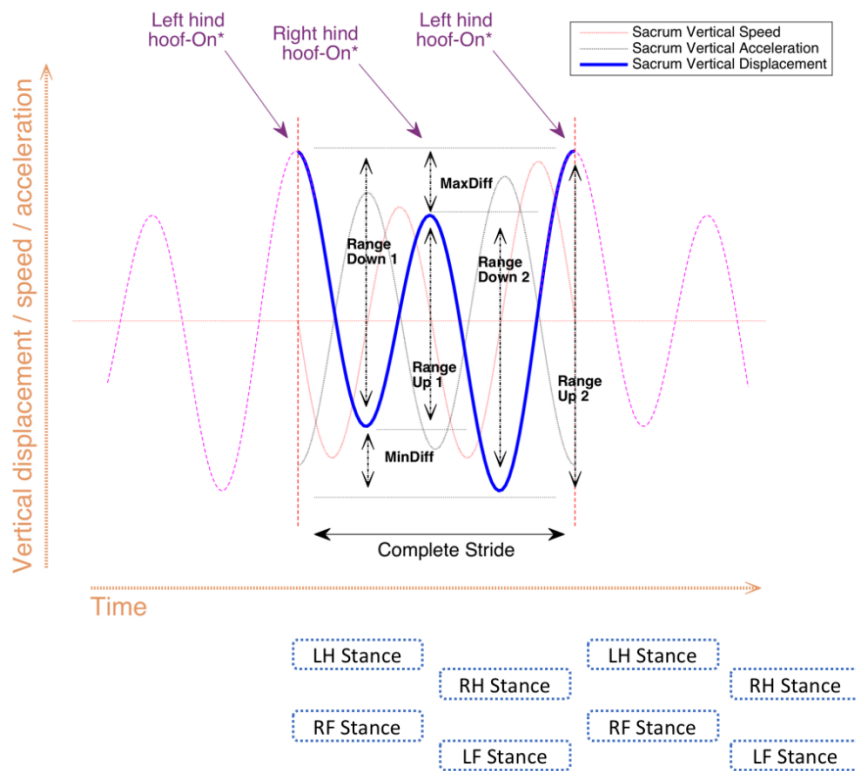

Supplement: EVJ-51-831-s003.pdf [file EVJ-51-831-s003.pdf]
