# Supplementary material for: Variation in gait parameters used for objective lameness assessment in sound horses at the trot on the straight line and the lunge
Source: PubMed Central journal article supplement (PMC6850282; doi:10.1111/evj.13075), 2019-02-12
Supplement: EVJ-51-831-s004.pdf [file EVJ-51-831-s004.pdf]

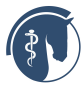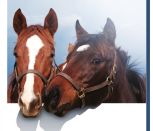

**Supplementary Item 4:** Baseline asymmetry mean (s.d.) of each horse on the straight line soft surface (M1).

| ID | Head         |              |             |             | Withers      |              |            |             |
|----|--------------|--------------|-------------|-------------|--------------|--------------|------------|-------------|
|    | Maxdiff (mm) | Mindiff (mm) | RUD (mm)    | RDD (mm)    | Maxdiff (mm) | Mindiff (mm) | RUD (mm)   | RDD (mm)    |
| 1  | -15.5 (31.5) | -9.0(24.9)   | -25.2(42.9) | 6.5(37.0)   | 15.8(12.4)   | 5.8 (22.7)   | 21.6(14.3) | -10.0(33.6) |
| 2  | 56.1 (47.3)  | -0.1(43.8)   | 50.3(63.6)  | -56.2(63.5) | 0.2(19.0)    | 0.7(24.3)    | 1.1(15.3)  | 0.5(41.2)   |
| 3  | 25.5 (28.5)  | 3.7(34.0)    | 28.0(49.0)  | -21.7(40.2) | 2.3(16.8)    | 3.0(24.1)    | 5.4(11.7)  | 0.7(40.0)   |
| 4  | -5.1 (31.4)  | -14.1(33.4)  | -17.8(47.8) | -9.1(40.7)  | 0.0(10.8)    | -2.0(16.4)   | -2.0(13.8) | -2.0(24.4)  |
| 5  | 0.3 (47.6)   | -21.5(59.2)  | -21.7(77.0) | -21.7(64.2) | -1.1(10.1)   | -1.6(18.7)   | -2.4(17.6) | -0.5(24.6)  |
| 6  | -2.2 (31.7)  | -10.4(36.6)  | -13.0(56.4) | -8.3(35.6)  | 2.7(10.8)    | 0.8(23.3)    | 3.5(18.5)  | -1.9(31.5)  |
| 7  | -27.2 (35.4) | -14.9(42.2)  | -39.6(62.1) | 12.2(43.3)  | 0.6(14.4)    | -1.7(15.2)   | -1.1(11.5) | -2.3(27.5)  |
| 8  | 4.3 (32.4)   | -5.1(35.4)   | -0.3(46.5)  | -9.5(46.1)  | 1.0(17.4)    | 0.0(22.3)    | -0.8(12.4) | -1.1(38.3)  |
| 9  | 15.4 (23.5)  | 0.0(46.0)    | 12.2(45.1)  | -15.4(56.5) | 5.3(11.0)    | 6.5(33.9)    | 11.9(26.2) | 1.2(43.0)   |
| 10 | 14.6 (31.9)  | 16.5(24.7)   | 31.7(44.4)  | 1.8(33.9)   | 15.9(21.2)   | 10.1(33.7)   | 26.1(15.6) | -5.8(54.0)  |
| 11 | 20.8 (43.4)  | 13.2(44.9)   | 32.9(59.6)  | -7.6(54.2)  | 2.1(14.7)    | -4.2(18.9)   | -2.0(13.7) | -6.3(31.3)  |
| 12 | 19.5 (27.2)  | 14.4(39.1)   | 28.9(50.5)  | -5.1(38.6)  | -4.4(9.5)    | -2.4(20.9)   | -6.8(14.7) | 2.0(29.1)   |

| ID | Pelvis       |              |             |             |                  |                  |
|----|--------------|--------------|-------------|-------------|------------------|------------------|
|    | Maxdiff (mm) | Mindiff (mm) | RUD (mm)    | RDD (mm)    | HipHikeDiff (mm) | HipDropDiff (mm) |
| 1  | -27.3(12.4)  | -1.95(17.1)  | -29.0(13.0) | 25.4(26.7)  | -26.4(12.1)      | 56.8(10.5)       |
| 2  | 4.1(11.3)    | -5.9(10.2)   | -1.7(18.0)  | -10.0(11.9) | 1.4(14.1)        | 37.2(18.3)       |
| 3  | 7.6(13.4)    | 1.7(18.5)    | 9.7(12.7)   | -5.9(29.7)  | 7.0(10.9)        | 19.3(11.4)       |
| 4  | -0.9(12.4)   | 1.8(27.9)    | 1.1(22.2)   | 2.8(37.3)   | 0.5(14.8)        | 13.8(10.1)       |
| 5  | 9.5(12.7)    | 0.4(36.1)    | 9.9(30.7)   | -9.1(44.7)  | 14.5(19.7)       | 37.1(13.8)       |
| 6  | 7.2(18.0)    | 6.6(9.7)     | 13.8(19.8)  | -0.6(21.9)  | 12.2(23.8)       | 20.9(14.0)       |
| 7  | -1.8(13.4)   | -3.3(26.4)   | -5.2(21.2)  | -1.5(36.1)  | -4.0(15.2)       | 30.1(12.4)       |
| 8  | -5.2(8.0)    | -4.2(26.0)   | -9.3(26.6)  | 1.0(28.1)   | -5.0(21.3)       | 29.1(10.5)       |
| 9  | 11.1(7.6)    | -8.1(8.5)    | 3.2(12.7)   | -19.2(10.2) | -3.8(12.7)       | 7.3(12.4)        |
| 10 | -9.1(8.7)    | -9.1(7.3)    | -17.9(11.2) | 0.0(11.1)   | -20.5(13.8)      | 42.1(12.0)       |
| 11 | 2.3(8.9)     | -0.1(10.4)   | 2.2(15.2)   | -2.4(12.3)  | 2.0(13.6)        | 24.9(10.8)       |
| 12 | -22.4(8.3)   | -3.9(12.9)   | -26.1(12.4) | 18.6(18.0)  | -22.5(11.2)      | 42.7(8.8)        |
