# Supplementary material for: Variation in gait parameters used for objective lameness assessment in sound horses at the trot on the straight line and the lunge
Source: PubMed Central journal article supplement (PMC6850282; doi:10.1111/evj.13075), 2019-02-12
Supplement: EVJ-51-831-s005.pdf [file EVJ-51-831-s005.pdf]

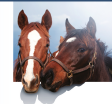

**Supplementary Item 5:** Model estimates (square root transformed) for the measurements 'absolute between day variation'. \* Intercept = referenced level (day one, straight line, soft surface).

| Square root domain |              |          |         |          |         |          |         |          |         |
|--------------------|--------------|----------|---------|----------|---------|----------|---------|----------|---------|
|                    |              | MinDiff  |         | MaxDiff  |         | RUD      |         | RDD      |         |
|                    |              | Estimate | p-value | Estimate | p-value | Estimate | p-value | Estimate | p-value |
| Head               | Intercept*   | 2.91     |         | 2.63     |         | 3.48     |         | 3.29     |         |
|                    | Repetition 2 | 0.01     | 0.9     | 0.06     | 0.3     | 0.03     | 0.6     | 0.08     | 0.2     |
|                    | Repetition 3 | -0.15    | 0.04    | -0.07    | 0.3     | -0.07    | 0.4     | -0.05    | 0.5     |
|                    | Repetition 4 | -0.18    | 0.01    | -0.05    | 0.4     | -0.12    | 0.1     | -0.12    | 0.08    |
|                    | Repetition 5 | -0.15    | 0.03    | -0.05    | 0.4     | -0.16    | 0.03    | -0.11    | 0.1     |
|                    | Surface Hard | -0.22    | <0.001  | -0.14    | 0.01    | -0.12    | 0.07    | -0.36    | <0.001  |
|                    | Circle left  | 0.26     | <0.001  | 0.31     | <0.001  | 0.40     | <0.001  | 0.38     | <0.001  |
|                    | Circle right | 0.25     | <0.001  | 0.26     | <0.001  | 0.30     | <0.001  | 0.37     | <0.001  |
|                    | Day 2        | 0.02     | 0.7     | -0.04    | 0.4     | -0.05    | 0.3     | -0.02    | 0.7     |
|                    | Day3         | -0.13    | 0.08    | -0.09    | 0.2     | -0.15    | 0.07    | -0.14    | 0.06    |
| Withers            | Intercept*   | 1.64     |         | 1.54     |         | 2.05     |         | 2.04     |         |
|                    | Repetition 2 | -0.01    | 0.7     | -0.02    | 0.4     | -0.02    | 0.5     | -0.04    | 0.3     |
|                    | Repetition 3 | -0.05    | 0.1     | -0.05    | 0.09    | -0.05    | 0.2     | -0.05    | 0.2     |
|                    | Repetition 4 | -0.08    | 0.01    | -0.08    | 0.004   | -0.10    | 0.01    | -0.10    | 0.004   |
|                    | Repetition 5 | -0.06    | 0.03    | -0.07    | 0.01    | -0.11    | 0.001   | -0.08    | 0.02    |
|                    | Surface Hard | -0.15    | <0.001  | -0.11    | <0.001  | -0.12    | <0.001  | -0.19    | <0.001  |
|                    | Circle left  | 0.19     | <0.001  | 0.20     | <0.001  | 0.16     | <0.001  | 0.31     | <0.001  |
|                    | Circle right | 0.15     | <0.001  | 0.11     | <0.001  | 0.12     | <0.001  | 0.21     | <0.001  |
|                    | Day 2        | -0.08    | <0.001  | -0.04    | 0.02    | -0.07    | 0.004   | -0.11    | <0.001  |
|                    | Day3         | -0.06    | 0.07    | -0.04    | 0.2     | -0.04    | 0.2     | -0.11    | 0.002   |
| Pelvis             | Intercept*   | 1.83     |         | 1.62     |         | 2.26     |         | 2.18     |         |
|                    | Repetition 2 | -0.04    | 0.09    | -0.02    | 0.4     | -0.04    | 0.2     | -0.01    | 0.8     |
|                    | Repetition 3 | -0.02    | 0.5     | -0.08    | 0.01    | -0.10    | 0.01    | -0.06    | 0.09    |
|                    | Repetition 4 | -0.07    | 0.01    | -0.07    | 0.01    | -0.08    | 0.03    | -0.09    | 0.01    |
|                    | Repetition 5 | -0.08    | 0.01    | -0.06    | 0.04    | -0.11    | 0.002   | -0.07    | 0.06    |
|                    | Surface Hard | -0.19    | <0.001  | -0.07    | 0.004   | -0.22    | <0.001  | -0.17    | <0.001  |
|                    | Circle left  | 0.10     | <0.001  | 0.16     | <0.001  | 0.11     | <0.001  | 0.15     | <0.001  |
|                    | Circle right | 0.06     | 0.01    | 0.10     | <0.001  | 0.06     | 0.06    | 0.12     | <0.001  |
|                    | Day 2        | -0.06    | 0.002   | -0.03    | 0.1     | -0.07    | 0.01    | -0.03    | 0.1     |
|                    | Day3         | -0.11    | <0.001  | -0.11    | <0.001  | -0.14    | <0.001  | -0.17    | <0.001  |
| Hip                | Intercept*   | 2.27     |         | 2.31     |         |          |         |          |         |
|                    | Repetition 2 | -0.02    | 0.6     | -0.03    | 0.4     |          |         |          |         |
|                    | Repetition 3 | -0.06    | 0.1     | -0.10    | 0.02    |          |         |          |         |
|                    | Repetition 4 | -0.06    | 0.1     | -0.06    | 0.1     |          |         |          |         |
|                    | Repetition 5 | -0.12    | 0.01    | -0.17    | <0.001  |          |         |          |         |
|                    | Surface Hard | -0.22    | <0.001  | -0.19    | <0.001  |          |         |          |         |
|                    | Circle left  | 0.18     | <0.001  | 0.14     | <0.001  |          |         |          |         |
|                    | Circle right | 0.10     | 0.01    | 0.05     | 0.1     |          |         |          |         |
|                    | Day 2        | -0.08    | 0.01    | -0.06    | 0.04    |          |         |          |         |
|                    | Day3         | -0.15    | 0.002   | -0.10    | 0.03    |          |         |          |         |
